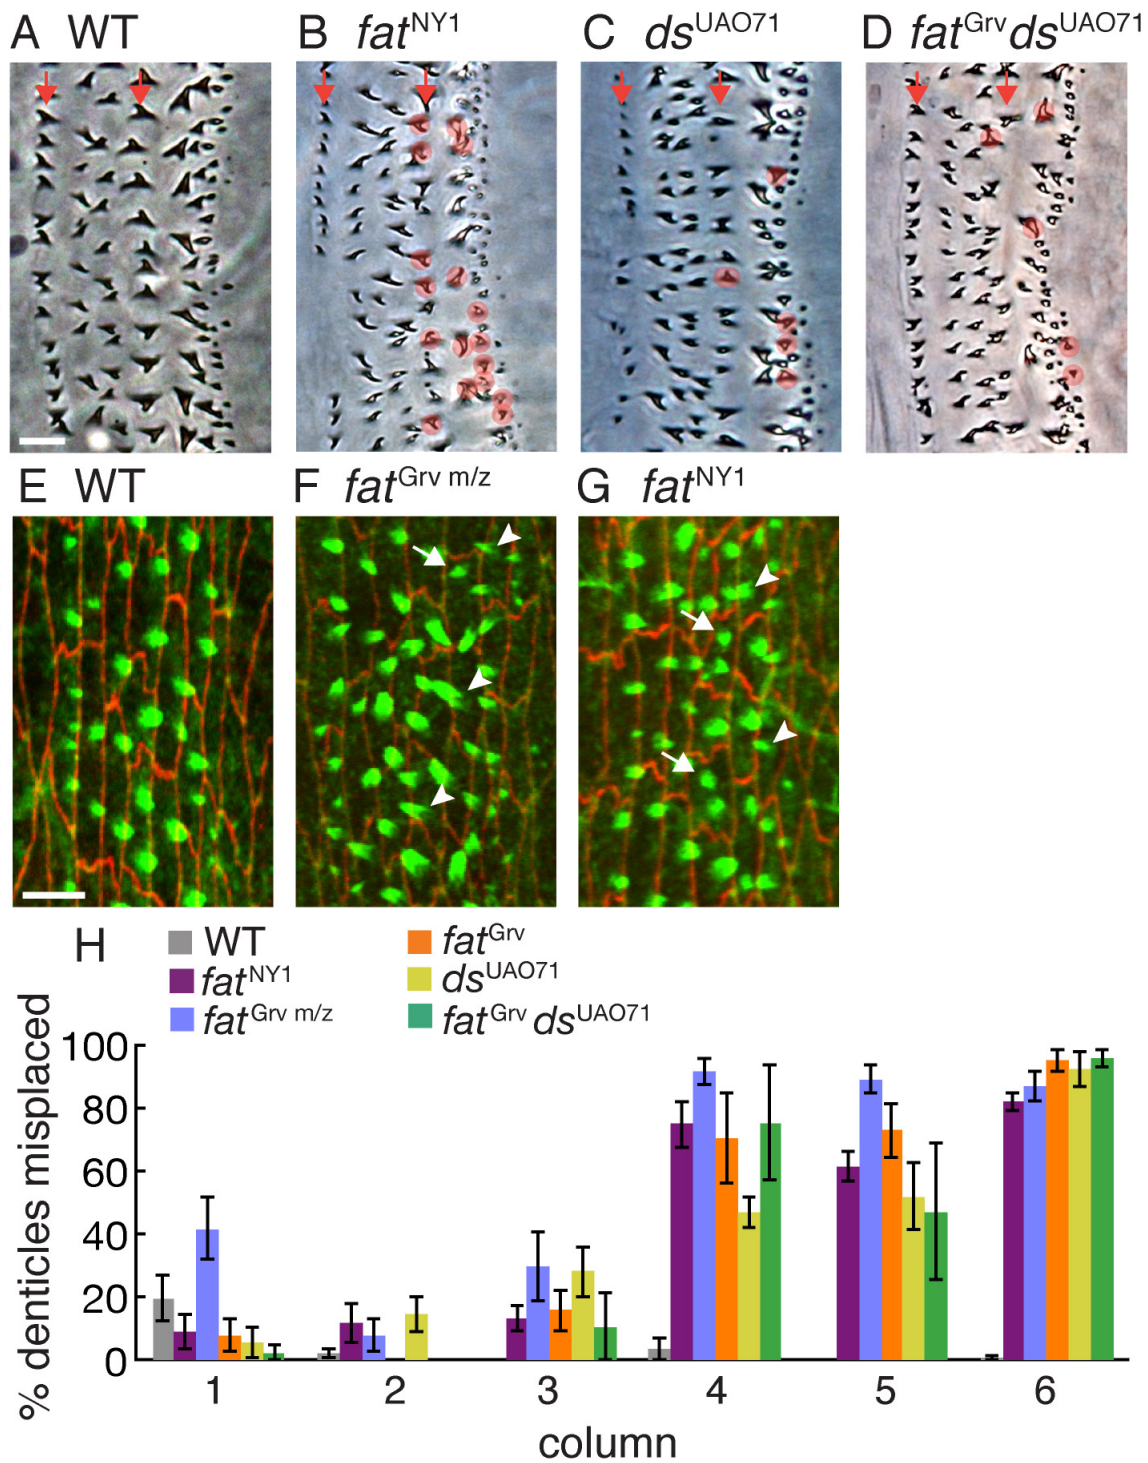

**Fig. S1. Denticle placement defects in *fat* and *dachshous* mutants.** (A-D) Cuticle preparations of wild-type (WT) (A), *fat*<sup>NY1</sup> (B), *ds*<sup>UAO71</sup> (C) and *fat*<sup>Grv</sup> *ds*<sup>UAO71</sup> (D) embryos. A majority of denticles point posteriorly in WT, with the exception of columns 1 and 4 (arrows), which point anteriorly. Misoriented denticles are highlighted in red. (E-G) Stage 15 denticle belts stained for F-actin (phalloidin, green) and E-cadherin (red) in WT (E), *fat*<sup>Grv m/z</sup> mutants that lack maternal and zygotic *fat* activity (F) and *fat*<sup>NY1</sup> zygotic mutants (G). Ventral views, anterior left. (H) Percentage of misplaced denticle precursors by column in WT, *fat*<sup>NY1</sup> zygotic mutants, *fat*<sup>Grv m/z</sup> mutants, *fat*<sup>Grv</sup> zygotic mutants, *ds*<sup>UAO71</sup> zygotic mutants and *fat*<sup>Grv</sup> *ds*<sup>UAO71</sup> double zygotic mutants. All mutants were significantly different from WT in columns 4-6 ( $P < 0.01$ ). All mutant genotypes except *fat*<sup>Grv</sup> *ds*<sup>UAO71</sup> were significantly different from WT in column 3 ( $P < 0.05$ ). Denticle placement defects in embryos lacking maternal and zygotic *fat*<sup>Grv</sup> activity were not significantly different from *fat*<sup>Grv</sup> zygotic mutants except in column 1 ( $P = 0.008$ ). A single value was obtained for each column in each embryo (400-640 denticles in four to six embryos/genotype). The mean  $\pm$  s.e.m. of these values is shown. Scale bars: 5  $\mu$ m.

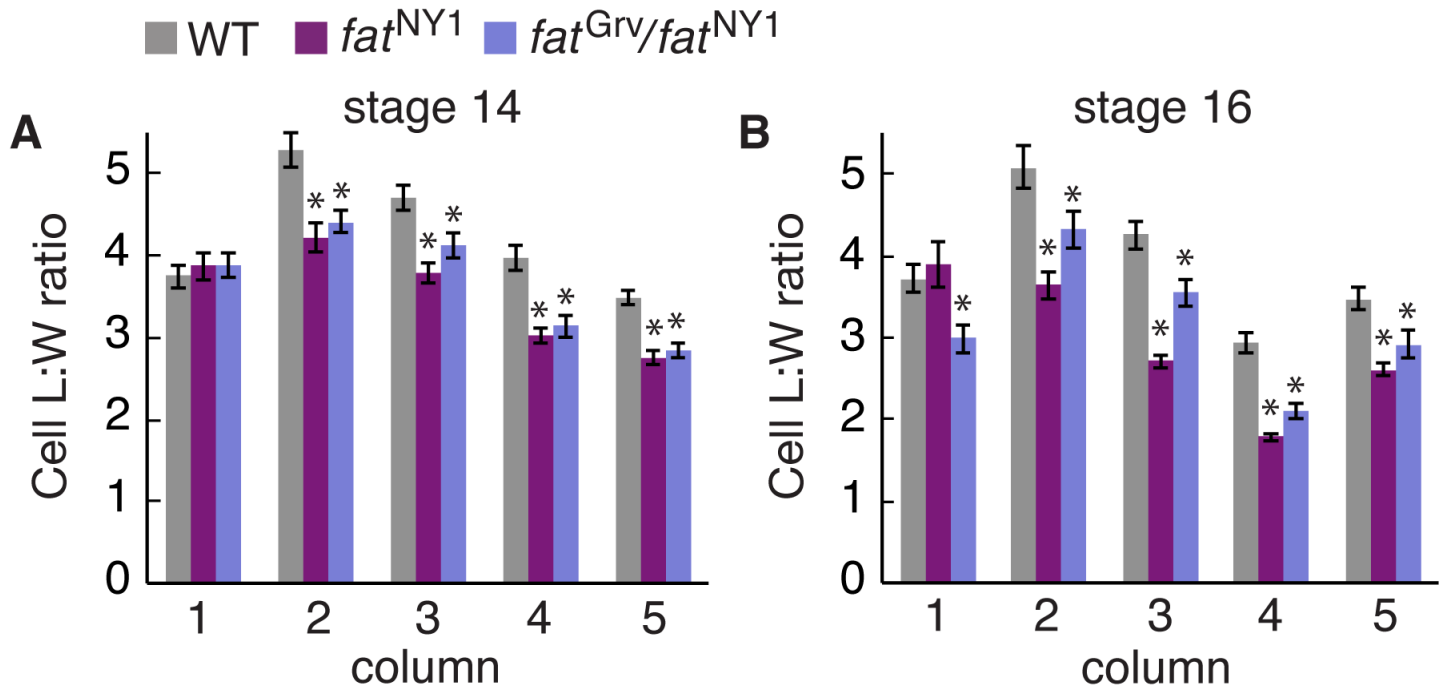

**Fig. S2. Cell shape defects in *fat* mutants.** Cell length:width (L:W) ratios (the ratio of cell length along the DV axis to cell width along the AP axis) plotted by column in stage 14 wild type (WT), *fat*<sup>NY1</sup> zygotic mutant and *fat*<sup>Grv</sup>/*fat*<sup>NY1</sup> transheterozygous embryos. **(A)** Stage 14 cell L:W ratios were decreased in *fat*<sup>NY1</sup> in columns 2-5 ( $P < 0.001$ ), and in *fat*<sup>Grv</sup>/*fat*<sup>NY1</sup> in columns 2 ( $P < 0.001$ ), 3 ( $P = 0.01$ ), 4 ( $P < 0.001$ ) and 5 ( $P < 0.001$ ). **(B)** Stage 16 cell L:W ratios were decreased in *fat*<sup>NY1</sup> in columns 2-5 ( $P < 0.001$ ) and in *fat*<sup>Grv</sup>/*fat*<sup>NY1</sup> in columns 1 ( $P < 0.01$ ), 2 ( $P < 0.05$ ), 3 ( $P < 0.01$ ), 4 ( $P < 0.001$ ) and 5 ( $P = 0.012$ ). A ratio was measured for each cell (40-75 cells in four embryos/column). The mean  $\pm$  s.e.m. of these values is shown. Asterisks indicate statistical significance.

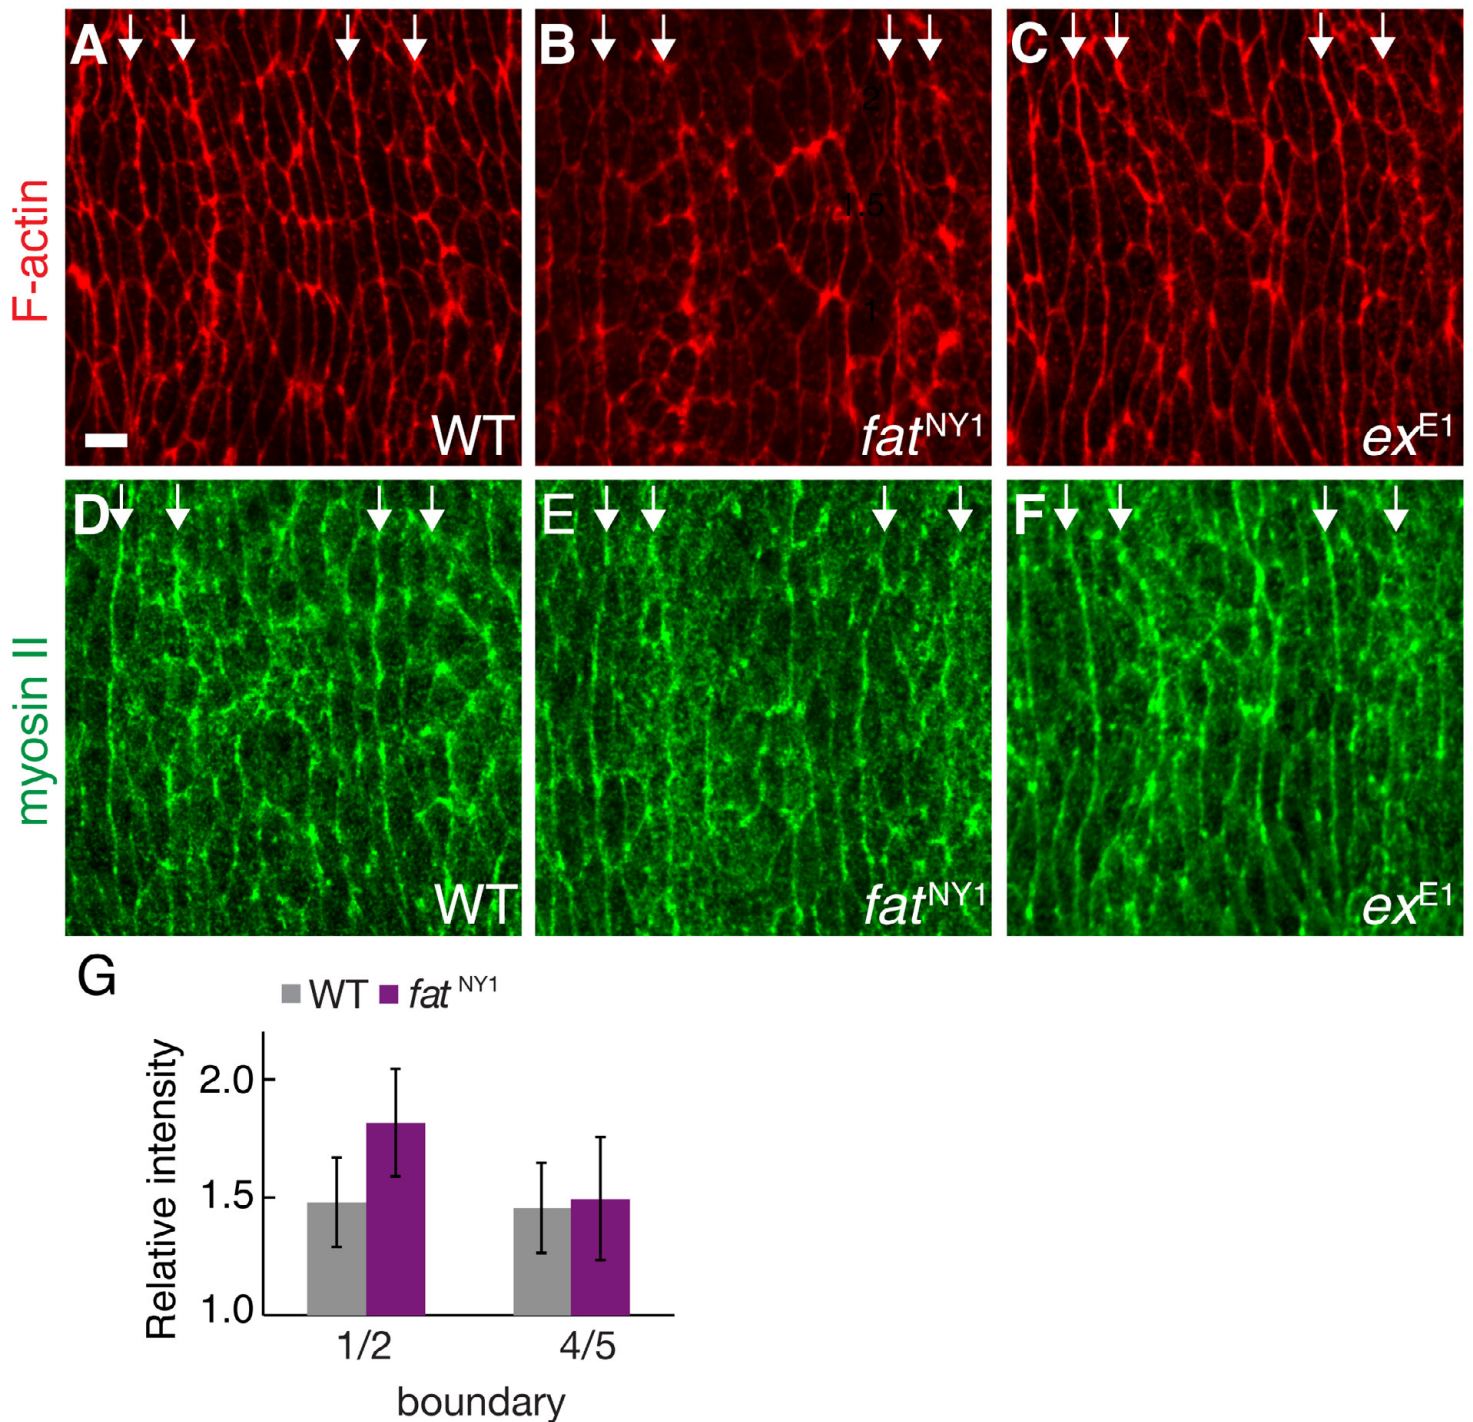

**Fig. S3. Myosin and F-actin are correctly enriched at specific column boundaries in *fat* mutants.** (A-C) Mid-stage 13 denticle belts in wild type (WT) (A), *fat*<sup>NY1</sup> (B) and *ex*<sup>E1</sup> (C) embryos stained with phalloidin to visualize F-actin. (D-F) Mid-stage 13 denticle belts in WT (D), *fat*<sup>NY1</sup> (E) and *ex*<sup>E1</sup> (F) embryos expressing a myosin II regulatory light chain GFP fusion (*sqh*:GFP) visualized with antibodies to GFP. Myosin II and F-actin accumulate at the column 1/2 and 4/5 boundaries (arrows) to a similar extent in WT, *fat* and *ex*. Ventral views, anterior left. (G) Enrichment of myosin II at AP edges compared with DV edges at the column 1/2 and 4/5 boundaries in WT and *fat*<sup>NY1</sup>. In WT, myosin was enriched 1.5 $\pm$ 0.2-fold at the column 1/2 boundary and 1.5 $\pm$ 0.2-fold at the column 4/5 boundary. In *fat*<sup>NY1</sup>, myosin was enriched 1.8 $\pm$ 0.2-fold at the column 1/2 boundary and 1.5 $\pm$ 0.3-fold at the column 4/5 boundary. A single value was obtained for each embryo by averaging the ratio of the average AP intensity to the average DV intensity for six to seven cells in two denticle belts/embryo (three to four embryos/genotype). The mean $\pm$ s.e.m. of these values is shown. Scale bar: 5  $\mu$ m.



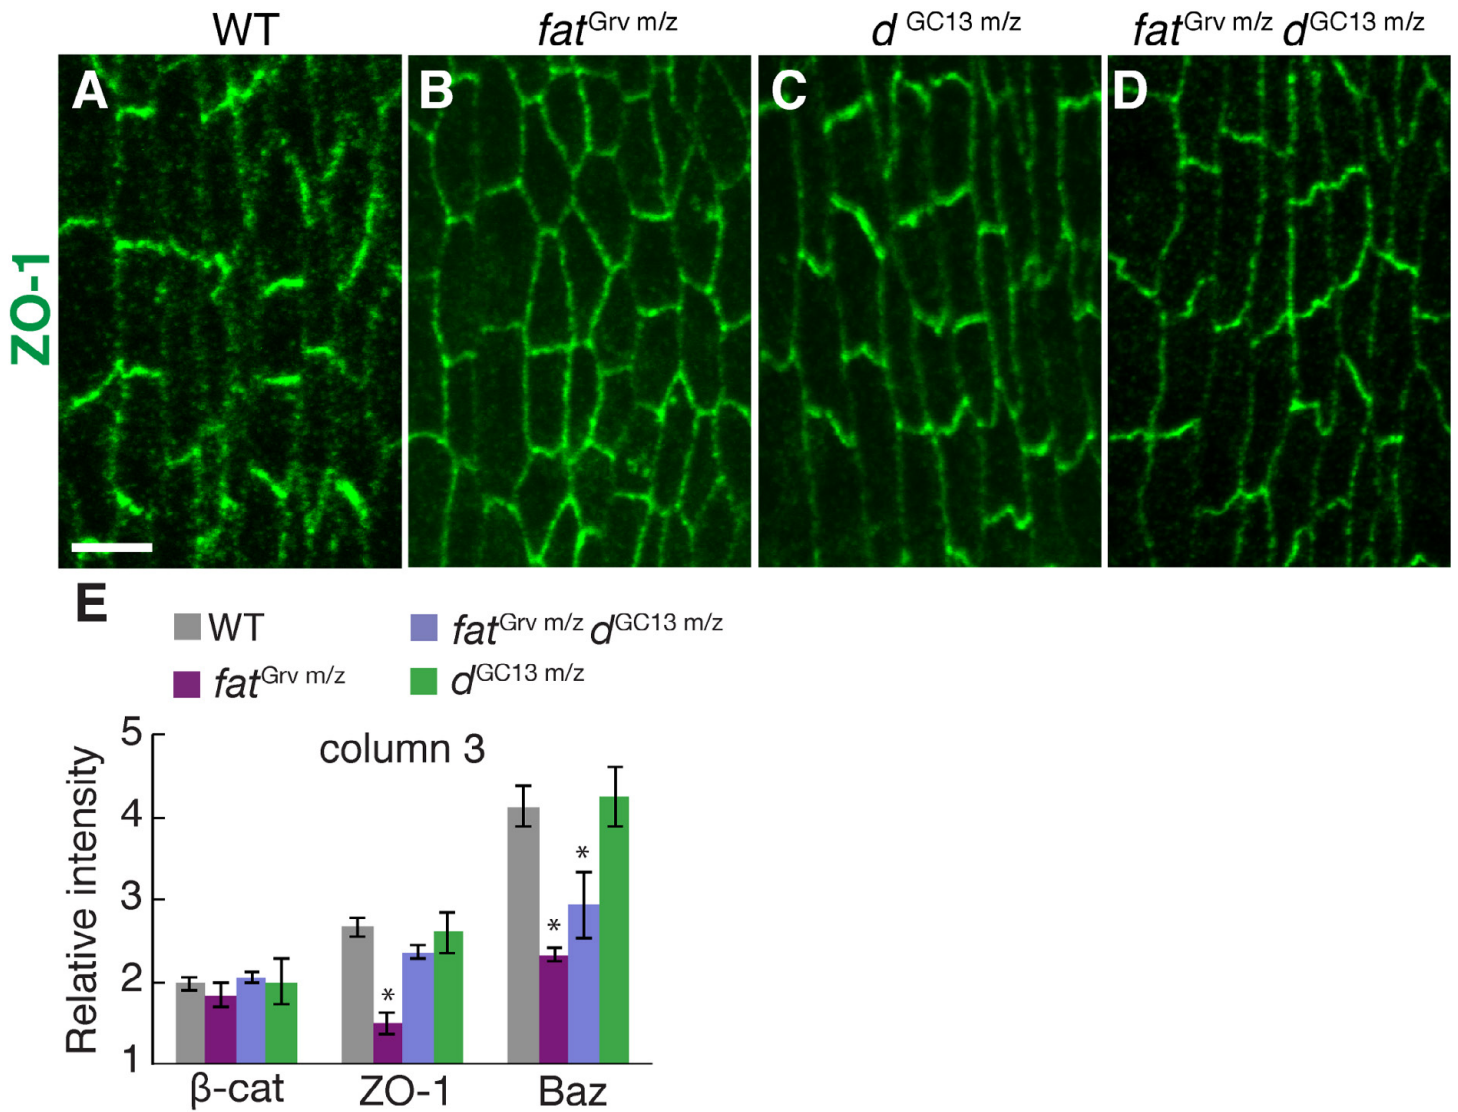

**Fig. S4. Loss of *dachs* suppresses a subset of the junctional defects in *fat* mutants.** (A-D) Stage 14 denticle belts stained for ZO-1 (green) in wild type (WT) (A) and embryos maternally and zygotically mutant for *fat*<sup>Grv m/z</sup> (B), *d*<sup>GC13 m/z</sup> (C) and both *fat*<sup>Grv m/z</sup> and *d*<sup>GC13 m/z</sup> (D). Scale bar: 5  $\mu$ m. (E) Enrichment of junctional proteins at DV edges in column 3 of stage 14 embryos of the indicated genotypes. The enrichment of ZO-1 and Baz was significantly reduced in *fat*<sup>Grv m/z</sup> ( $P < 0.001$  for ZO-1 and  $P < 0.02$  for Baz). *d*<sup>GC13 m/z</sup> was not significantly different from WT. Embryos doubly mutant for *fat* and *dachs* had WT ZO-1 localization ( $P = 0.2$  compared with WT,  $P = 0.04$  compared with *fat*<sup>Grv m/z</sup>). However, Baz enrichment was significantly reduced in *fat dachs* double mutants ( $P = 0.02$  compared with WT), indicating that *dachs* does not suppress all aspects of the *fat* mutant phenotype. A single value was calculated for each embryo by measuring the ratio of average DV intensity to average AP intensity for five to seven cells in two denticle belts/embryo;  $n = 4$  embryos for each genotype. The mean  $\pm$  s.e.m. of these values is shown.

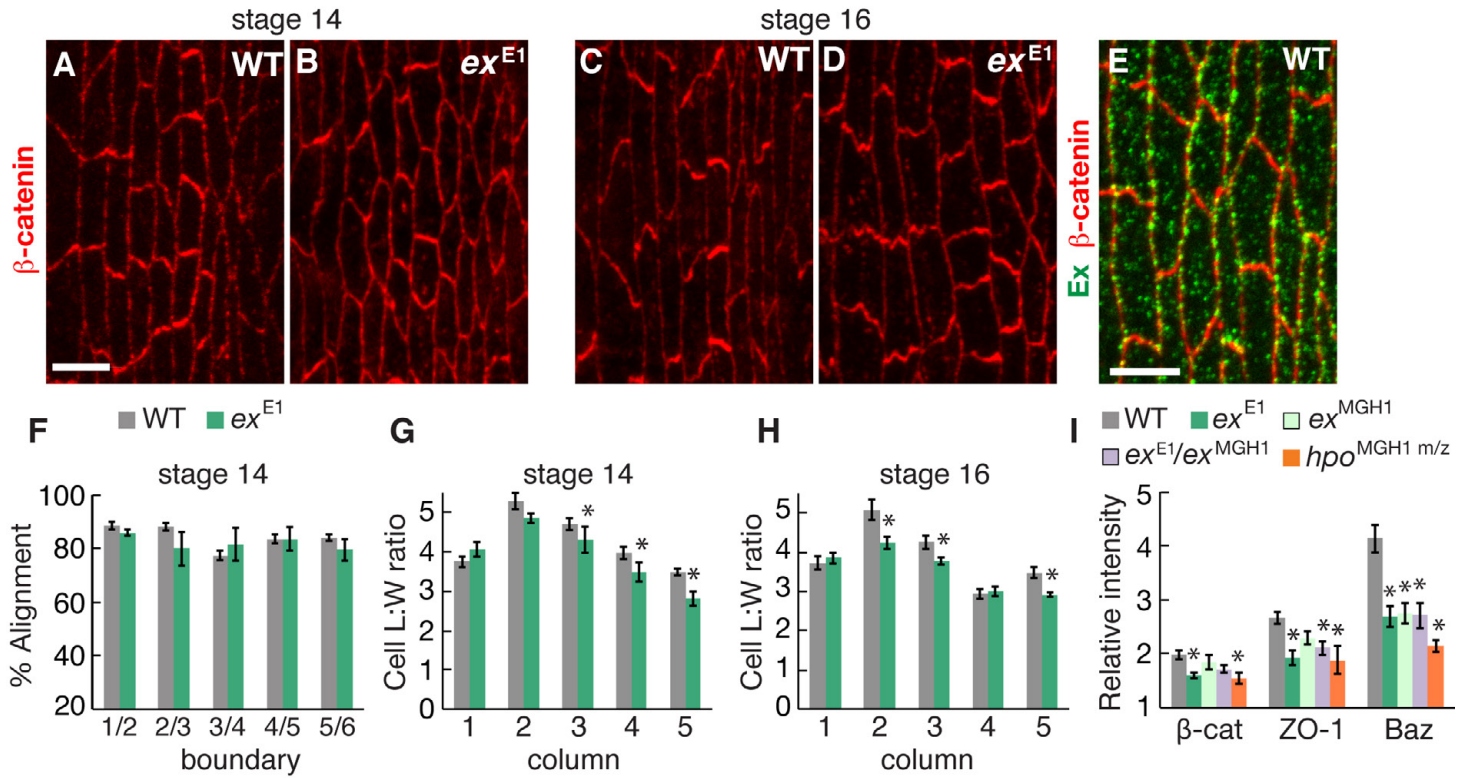

**Fig. S5. Cell-shape defects in *expanded* mutants.** (A-D) Denticle belts stained for  $\beta$ -catenin in wild type (WT) (A,C) and  $ex^{E1}$  (B,D) embryos at stage 14 (A,B) or stage 16 (C,D). Ventral views, anterior left. Scale bar: 5  $\mu$ m. (E) WT denticle belt stained for Ex (green) and  $\beta$ -catenin (red) at stage 14. (F) Edge alignment in WT (gray) and  $ex^{E1}$  (green) at stage 14. Alignment in  $ex^{E1}$  was not significantly different from WT. A single value was obtained for each column boundary in each embryo by averaging all angles measured for that boundary (40 angles in four embryos/boundary). The mean $\pm$ s.e.m. of these values is shown. (G,H) Cell length:width (L:W) ratios (the ratio of cell length along the DV axis to cell width along the AP axis) plotted by column in WT and  $ex^{E1}$  at stage 14 (G) and stage 16 (H). Cell L:W ratios were decreased in stage 14  $ex^{E1}$  embryos compared with WT in columns 3 ( $P=0.02$ ), 4 ( $P=0.04$ ) and 5 ( $P<0.001$ ), and in stage 16  $ex^{E1}$  embryos in columns 2 ( $P=0.006$ ), 3 ( $P=0.01$ ) and 5 ( $P<0.001$ ). A ratio was measured for each cell (30-75 cells in four embryos/column). The mean $\pm$ s.e.m. of these values is shown. (I) Enrichment of junctional proteins at DV edges in column 3 of stage 14 WT,  $ex^{E1}$ ,  $ex^{MGH1}$ ,  $ex^{E1}/ex^{MGH1}$  and  $hpo^{MGH1\ m/z}$  embryos. The enrichment of several junctional proteins at DV edges was significantly reduced in  $ex^{E1}$  ( $P<0.001$  for  $\beta$ -catenin, ZO-1 and Baz),  $ex^{MGH1}$  ( $P=0.005$  for Baz),  $ex^{E1}/ex^{MGH1}$  ( $P=0.04$  for ZO-1;  $P=0.02$  for Baz) and  $hpo^{MGH1\ m/z}$  ( $P<0.02$  for  $\beta$ -cat;  $P=0.006$  for ZO-1; and  $P<0.001$  for Baz). A single value was calculated for each embryo by measuring the ratio of the average DV intensity to the average AP intensity for five to seven cells in two denticle belts/embryo;  $n=4$  embryos for each genotype. The mean $\pm$ s.e.m. of these values is shown. Maternal gene products may obscure additional requirements for Ex, as we were unable to obtain embryos that lack maternal *ex* activity.

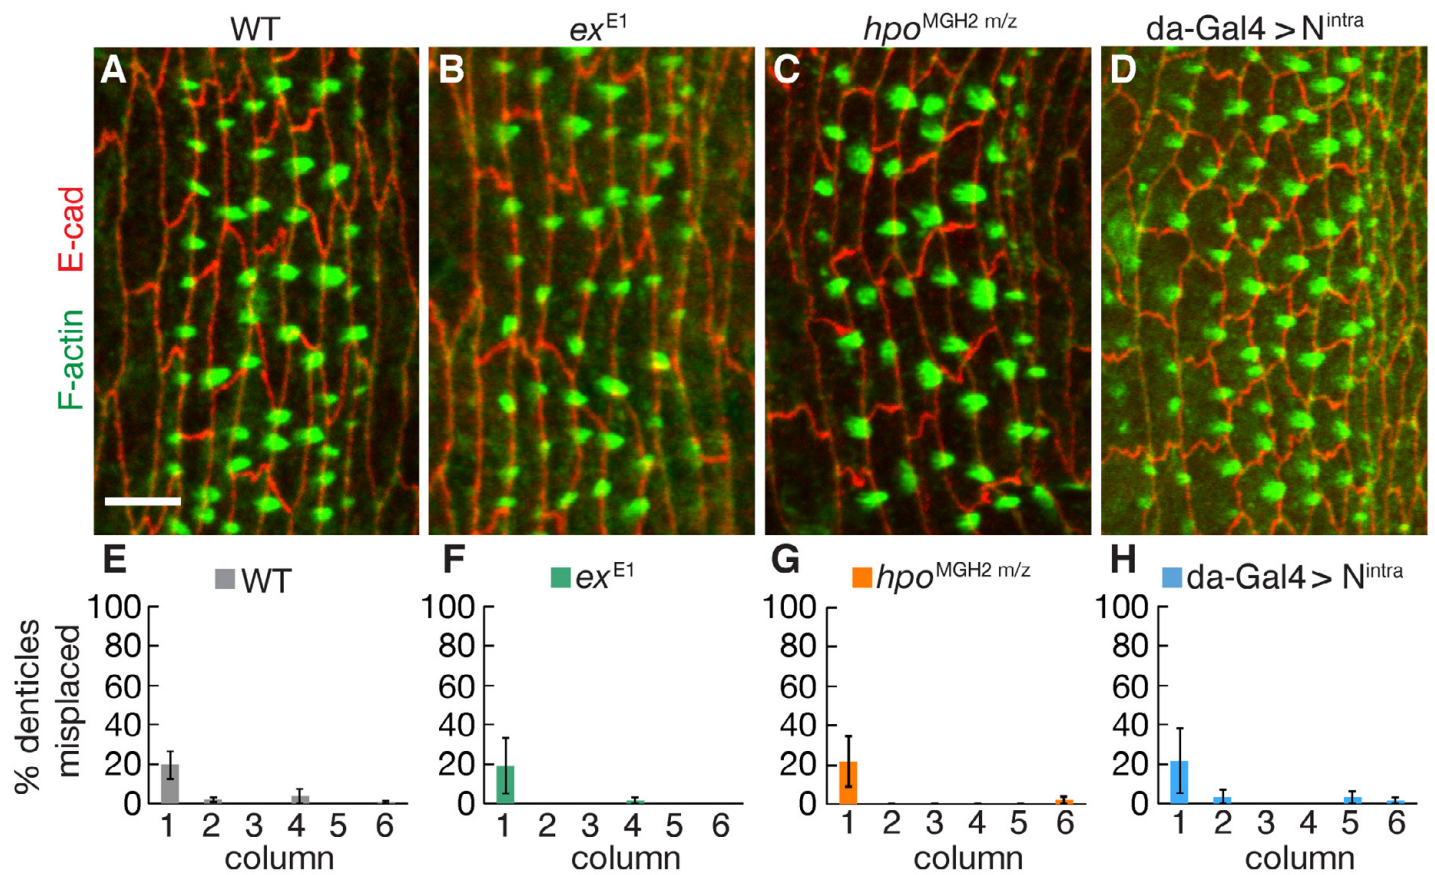

**Fig. S6. Denticle placement in wild-type, *ex* mutant and *N<sup>intra</sup>*-expressing embryos.** (A-D) Stage 15 denticle belts stained for F-actin (phalloidin, green) and E-cadherin (red) in wild type (WT) (A), *ex<sup>E1</sup>* (B), *hpo<sup>MGH2 m/z</sup>* (C) and *da-Gal4 > N<sup>intra</sup>* (D) embryos. Scale bar: 5  $\mu$ m. (E-H) Percentage of misplaced denticle precursors plotted by column for WT (E), *ex<sup>E1</sup>* (F), *hpo<sup>MGH2 m/z</sup>* (G) and *da-Gal4 > N<sup>intra</sup>* (H) embryos. Denticle precursors were correctly localized to the posterior cell cortex. Ventral views, anterior left. A single value was obtained for each column in each embryo (354-464 denticles in three to five embryos/genotype). The mean $\pm$ s.e.m. of these values is shown.



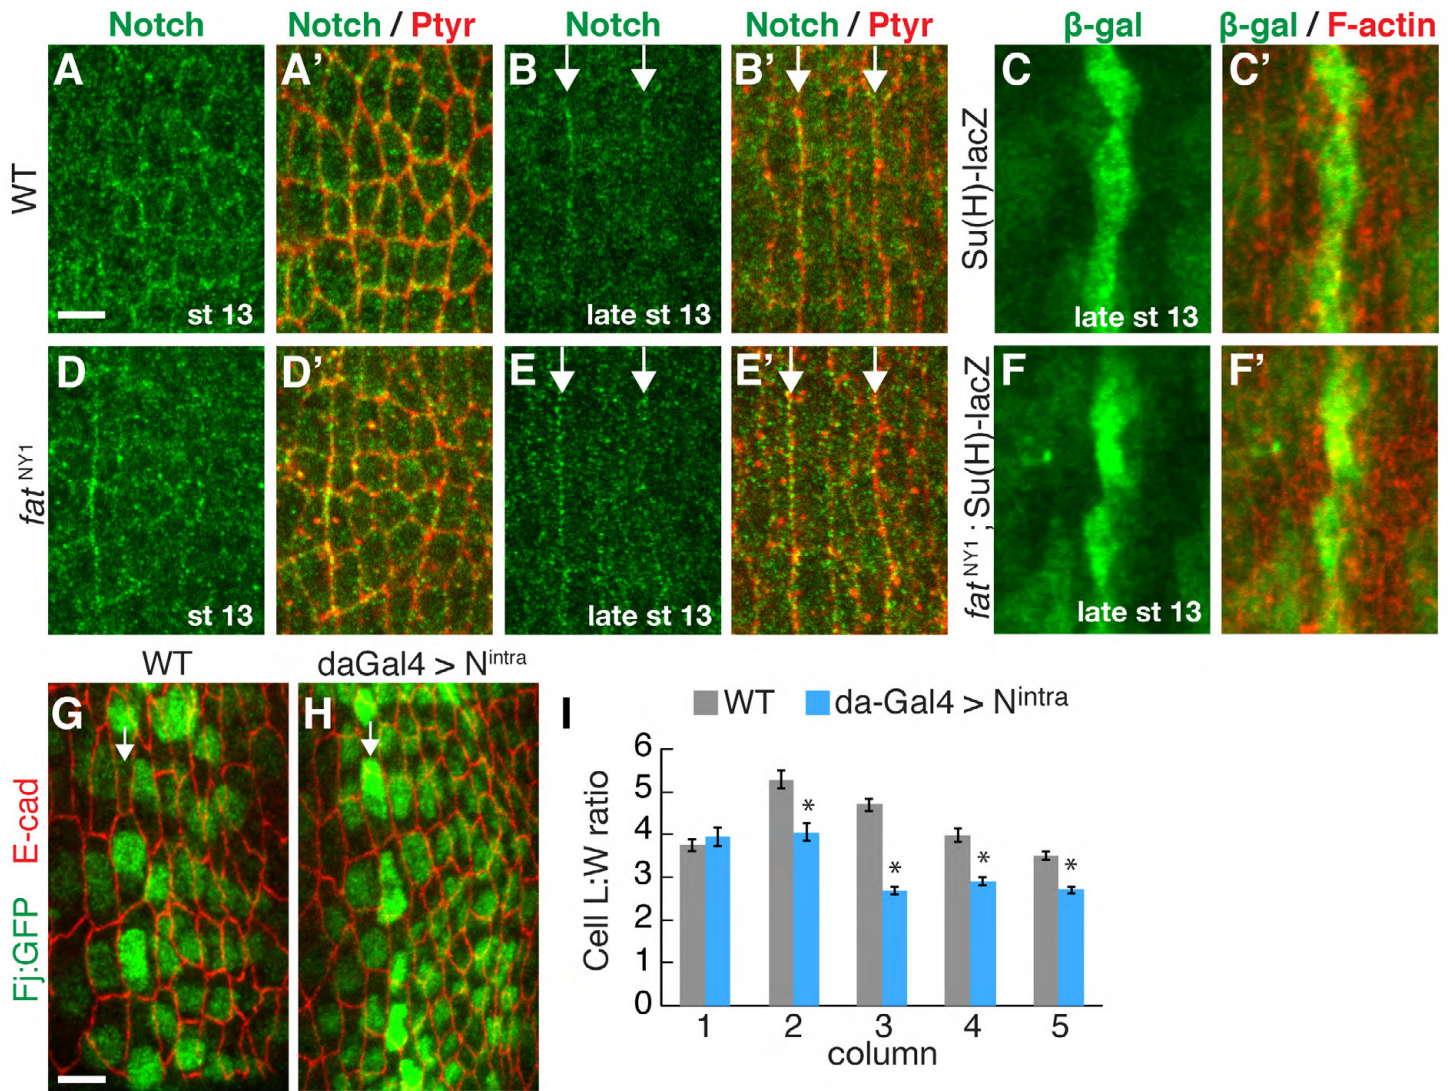

**Fig. S7. Notch activation recapitulates the cell-shape defects of *fat* mutants.** (A-B', D-E') Denticle belts at the indicated stages stained for Notch (green) and phosphotyrosine (Ptyr, red). (A,D) In early stage 13, Notch localizes to the apical cortex of wild-type (WT) (A) and *fat*<sup>NY1</sup> (D) embryos. (B) In late stage 13, Notch is enriched at the column 1/2 and 4/5 boundaries (arrows) in WT. (E) This localization occurs normally in *fat*<sup>NY1</sup>. (C,F) Late stage 13 denticle belts stained for F-actin (phalloidin, red) and  $\beta$ -gal (green) to visualize the expression of the *Su(H)lacZ* Notch activity reporter in WT (C) and *fat*<sup>NY1</sup> (F). The column 4-specific pattern of *Su(H)lacZ* expression occurs normally in *fat*<sup>NY1</sup>. Ventral views, anterior left. (G,H) Localization of the endogenous Four-jointed protein using a Four-jointed:GFP (Fj:GFP) trap line visualized with antibodies to GFP. Fj:GFP was expressed throughout the denticle field, with an enrichment in column 2 (arrows). This enrichment of Fj:GFP expression was retained in N<sup>intra</sup>-expressing embryos, although a broadening of the Fj domain is apparent. (I) Cell length:width (L:W) ratios (the ratio of cell length along the DV axis to cell width along the AP axis) plotted by column in stage 14 WT and da-Gal4>N<sup>intra</sup> embryos. Cell L:W ratios were decreased in da-Gal4>N<sup>intra</sup> compared with WT in columns 2-5 ( $P < 0.001$ ). A ratio was measured for each cell (40-100 cells in four embryos/column). The mean  $\pm$  s.e.m. of these values is shown. Scale bars: 5  $\mu$ m.
